# Supplementary material for: Long-term Outcomes and Factors Affecting the Survival of Patients with Mucosal Esophageal Squamous Cell Carcinoma
Source: PubMed Central journal article supplement — Gut Liver. 2021 Jan 22;15(5):705–12. doi: 10.5009/gnl20254 (PMC8444104; doi:10.5009/gnl20254), 2021-01-22
Supplement: gnl-15-5-705-supple.pdf [file gnl-15-5-705-supple.pdf]

**Supplementary Table 1.** Summary of Three Locoregional Recurrences after Endoscopic Resection

| Variable                   | Case 1          | Case 2                | Case 3          |
|----------------------------|-----------------|-----------------------|-----------------|
| Age, yr                    | 72              | 55                    | 60              |
| Sex                        | Male            | Male                  | Male            |
| Charlson comorbidity index | 0               | 2                     | 0               |
| Tumor location             | Lower third     | Lower third           | Mid third       |
| Tumor size, cm             | 4               | 1.2                   | 2.4             |
| Tumor gross type           | IIa             | IIb                   | IIa             |
| Differentiation            | Moderately      | Moderately            | Moderately      |
| Depth of invasion          | m3              | m3                    | m3              |
| Lymphovascular invasion    | None            | None                  | None            |
| Resection margin           | R0              | R0                    | R0              |
| <i>En bloc</i> resection   | <i>En bloc</i>  | <i>En bloc</i>        | <i>En bloc</i>  |
| Time to recurrence, mo     | 36              | 18                    | 22              |
| Recurred LN                | Left gastric LN | Right supraclavicular | Left gastric LN |
| Additional treatment       | Radiotherapy    | Best supportive       | Surgery         |
| Outcome                    | Alive [48 mo]   | Alive [35 mo]         | Alive [34 mo]   |

m3, muscularis mucosa; LN, lymph node.
